# Supplementary material for: THE IMPACT OF SPATIAL SCALE AND HABITAT CONFIGURATION ON PATTERNS OF TRAIT VARIATION AND LOCAL ADAPTATION IN A WILD PLANT PARASITE
Source: PubMed Central journal article supplement (PMC3916884; doi:10.1111/evo.12239), 2013-09-11
Supplement: ev00068-0176-sd1.pdf [file ev00068-0176-sd1.pdf]

1 **Appendix A.** Detailed descriptions of statistical methods.

2

3 Overview

4 As a supplement to the short description of the statistical models provided in the article, we here  
5 offer a more detailed description. Statistical models are described verbally below and tabulated in  
6 table S2. The response variables, transformations and link functions are identified in Table S3. The  
7 contrasts specified to test for local adaptation across multiple scales are depicted in Figure S1.

8 To analyse the data, we used the framework of generalized linear mixed-effects models  
9 (Littell et al. 2006). All models were fitted with procedure GLIMMIX in SAS 9.3.

10

11 Models 1, 2 and 3:

12 To first assess the relative amount of variation in parasite life-history traits (i.e. the mean trait  
13 values) across spatial scales, we modelled ('model 1') each pathogen life-history trait as a function  
14 of the random variables '*Pathogen region*', '*Pathogen population*' (as nested within '*Pathogen*  
15 *region*') and '*Pathogen genotype*' (as nested within '*Pathogen population*'). As the mean trait level  
16 may also depend on variation in the host plant, we further added the random variables '*Host*  
17 *region*', '*Host population*' (as nested within '*Host region*') and '*Host genotype*' (as nested within  
18 '*Host population*'). To obtain a reasonably balanced and reciprocal dataset, we focused on the  
19 inoculation data obtained from the inoculations conducted on plant genotypes originating from focal  
20 populations. To further investigate differentiation in mean trait levels within the two regions, we  
21 also constructed separate models for Åland and Saaremaa. In these models ('models 2 and 3'), we  
22 only included the inoculations among pathogen and plant genotypes from either Åland or  
23 Saaremaa, respectively.

24 From these models, we use the parameter estimates of the random effects to calculate the  
25 fraction of the total variation explained by each factor. The total variation was calculated as the  
26 sum of parameter estimates from the random factors and, in case of a normally distributed  
27 response variable (see Table S3), the residual variation. The inherent binomial error was not  
28 included in the total variation. Tests for random factors were based on  $X^2$  values (log-likelihood

29 ratio test with one degree of freedom). The variation explained by each factor and its significance  
30 ( $p < 0.05$ ) is reported for model 1 in Table 2 in the main manuscript, and for models 2 and 3 in  
31 Table S5.

32

### 33 Models 4, 5 and 6:

34 To investigate the spatial scale of local adaptation, we modelled ('model 4') the fitness traits of the  
35 pathogen as a function of the fixed variables '*Pathogen region*' and '*Pathogen population*' (as  
36 nested within '*Pathogen region*'). To identify whether there was a consistent impact of distance on  
37 the inoculation outcome we included the fixed categorical variable '*Inoculation type*', which was  
38 coded as: 1 = inoculations among host and pathogen genotypes collected from the same  
39 population; 2 = inoculations among host and pathogen genotypes collected from populations within  
40 the same cluster; 3 = inoculations among host and pathogen genotypes collected from different  
41 clusters but within the same region; 4 = inoculations among host and pathogen genotypes  
42 collected from different regions. Finally, we added the random factors '*Host region*', '*Host cluster*'  
43 (nested within '*Host region*'), '*Host population*' (nested within '*Host cluster*') and '*Host genotype*'  
44 (nested within '*Host population*') to account for spatial variation in plant resistance. Finally, we  
45 included the random factor '*Pathogen genotype*' (nested within '*Pathogen population*') to account  
46 for variation among pathogen genotypes. Contrasts based on the factor '*Inoculation type*' were  
47 derived to test specific hypotheses regarding the occurrence and scale of local adaptation (see Fig.  
48 S1 for an illustration): i) Are pathogens adapted to local plants (i.e. within-population inoculations)  
49 as compared with plants in nearby locations? ii) Are pathogens adapted to local plants as  
50 compared with plants from different clusters in the same region? iii) Are pathogens adapted to local  
51 plants as compared with plants from the other region? iv) Are pathogens adapted to plants in their  
52 local cluster as compared to plants in a different cluster within the same region? And v) are  
53 pathogens adapted to plants from their local region as compared to plants from a different region?  
54 To further investigate local adaptation within the two regions, we also constructed separate models  
55 for Åland and Saaremaa. In these models ('model 5 & 6'), we only included the inoculations among  
56 pathogen and plant strains from either Åland or Saaremaa, respectively.

57           From each model, we extracted the least-squares means for each level of the fixed  
58 categorical variable '*Inoculation type*', which are reported in Tables 3 and 4 in the main manuscript.  
59 The contrasts identified above were specified using the function *lsmeans* in proc GLIMMIX.  
60 Significance of the contrasts was evaluated using t-tests.

61

## 62 **References**

63 Littell, R. C., G. A. Milliken, W. W. Stroup, R. D. Wolfinger, and O. Schabenberger. 2006. SAS® for  
64 Mixed Models. SAS Institute Inc., Cary, USA.

65

66

67

68 **Figure S1.** Visual depiction of the contrasts specified in models 4, 5 and 6. Shown are the  
 69 sampling locations in Åland and Saaremaa. Both regions are drawn at the indicated scale, but the  
 70 distance between the regions (c. 200 km) is shortened for visual clarity. Shown are – for the  
 71 westernmost population in Åland – the multiple scales under investigation: (1) refers to inoculations  
 72 of parasites on plants from the same population, (2) refers to inoculations of parasites on plants  
 73 from nearby host populations (separated by 0.16 – 1.6 km), (3) refers to inoculations of parasites  
 74 on plants from host populations in a different part of the same region (6.0 - 40.0 km), and (4) refers  
 75 to inoculations among the two regions (Åland and Saaremaa) set apart by c. 200 km. Below the  
 76 graph are the verbal descriptions of contrasts reported in Table 3 in the main manuscript.

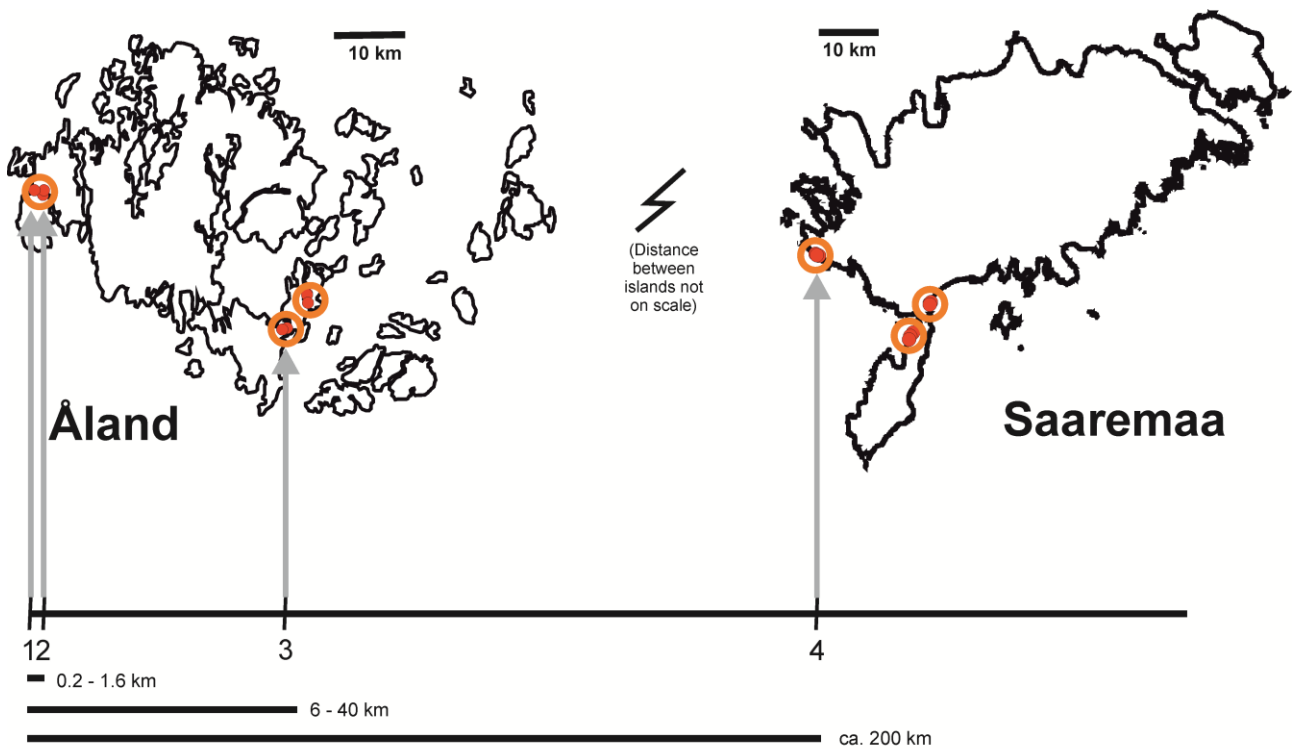

**Contrasts:**

- i) 1 versus 2: Are pathogens adapted to local plants (i.e. within-population inoculations) as compared with plants in nearby locations?
- ii) 1 versus 3: Are pathogens adapted to local plants as compared with plants from different clusters on the same island?
- iii) 1 versus 4: Are pathogens adapted to local plants as compared with plants from the other region?
- iv) 1 & 2 versus 3: Are pathogens adapted to plants in their local cluster as compared to plants in a different cluster on the same island?
- v) 1, 2 & 3 versus 4: Are pathogens adapted to plants on their local island as compared to plants on a different island?

**Table S1.** Inoculation matrix using a focal/non-focal design. For each combination of host and pathogen population are shown the number of inoculations. Each pathogen population was represented by four pathogen strains. The gray scale indicates the distance among host and pathogen populations, ranging from dark grey (inoculations between pathogens and hosts from the same population) to light grey (inoculations among pathogens and hosts from different regions). Focal host populations are in bold.

| Host region | Host cluster | Host population | pathogen population 1<br>(n=4 strains) | pathogen population 4<br>(n=4 strains) | pathogen population 7<br>(n=4 strains) | pathogen population 10<br>(n=4 strains) | pathogen population 13<br>(n=4 strains) | pathogen population 16<br>(n=4 strains) |
|-------------|--------------|-----------------|----------------------------------------|----------------------------------------|----------------------------------------|-----------------------------------------|-----------------------------------------|-----------------------------------------|
| Åland       | 1            | <b>1</b>        | 40                                     | 20                                     | 20                                     | 20                                      | 20                                      | 20                                      |
|             | 1            | 2               | 20                                     |                                        |                                        |                                         |                                         |                                         |
|             | 1            | 3               | 16                                     |                                        |                                        |                                         |                                         |                                         |
|             | 2            | <b>4</b>        | 20                                     | 40                                     | 20                                     | 20                                      | 20                                      | 20                                      |
|             | 2            | 5               |                                        | 20                                     |                                        |                                         |                                         |                                         |
|             | 2            | 6               |                                        | 20                                     |                                        |                                         |                                         |                                         |
|             | 3            | <b>7</b>        | 20                                     | 20                                     | 40                                     | 20                                      | 20                                      | 20                                      |
|             | 3            | 8               |                                        |                                        | 20                                     |                                         |                                         |                                         |
|             | 3            | 9               |                                        |                                        | 20                                     |                                         |                                         |                                         |
| Saaremaa    | 1            | <b>10</b>       | 20                                     | 20                                     | 20                                     | 40                                      | 20                                      | 20                                      |
|             | 1            | 11              |                                        |                                        |                                        | 20                                      |                                         |                                         |
|             | 1            | 12              |                                        |                                        |                                        | 20                                      |                                         |                                         |
|             | 2            | <b>13</b>       | 20                                     | 20                                     | 20                                     | 20                                      | 40                                      | 20                                      |
|             | 2            | 14              |                                        |                                        |                                        |                                         | 20                                      |                                         |
|             | 2            | 15              |                                        |                                        |                                        |                                         | 20                                      |                                         |
|             | 3            | <b>16</b>       | 20                                     | 20                                     | 20                                     | 20                                      | 20                                      | 40                                      |
|             | 3            | 17              |                                        |                                        |                                        |                                         |                                         | 20                                      |
|             | 3            | 18              |                                        |                                        |                                        |                                         |                                         | 20                                      |

**Table S2.** A summary of the generalized linear mixed models fitted for analyses. For each model, we specify the question and spatial scale addressed, the data used, and the fixed and random effects included. For the response variables examined and their link functions, see Table S3.

| Model          | Question addressed                        | Largest spatial scale | Inoculation data                                               | Fixed effects                                                              | Random effects                                                                                                                                                                    |
|----------------|-------------------------------------------|-----------------------|----------------------------------------------------------------|----------------------------------------------------------------------------|-----------------------------------------------------------------------------------------------------------------------------------------------------------------------------------|
| <b>Model 1</b> | <i>Do mean parasite traits vary?</i>      | Two regions           | Pathogen and host genotypes from focal populations             |                                                                            | Pathogen region + Pathogen population (Pathogen region) + Pathogen genotype (Pathogen population) + Host region + Host population (Host region) + Host genotype (Host population) |
| <b>Model 2</b> |                                           | Åland                 | Pathogen and host genotypes from focal populations in Åland    |                                                                            | Pathogen population + Pathogen genotype (Pathogen population) + Host population + Host genotype (Host population)                                                                 |
| <b>Model 3</b> |                                           | Saaremaa              | Pathogen and host genotypes from focal populations in Saaremaa |                                                                            | Pathogen population + Pathogen genotype (Pathogen population) + Host population + Host genotype (Host population)                                                                 |
| <b>Model 4</b> | <i>At which scale do pathogens adapt?</i> | Two regions           | All inoculation data                                           | Pathogen region + Pathogen population (Pathogen region) + Inoculation type | Host region + Host cluster (Host region) + Host population (Host cluster) + Host genotype (Host population) + Pathogen genotype (Pathogen population)                             |
| <b>Model 5</b> |                                           | Åland                 | Pathogen and host genotypes from populations in Åland          | Pathogen population + Inoculation type                                     | Host cluster + Host population (Host cluster) + Host genotype (Host population) + Pathogen genotype (Pathogen population)                                                         |
| <b>Model 6</b> |                                           | Saaremaa              | Pathogen and host genotypes from populations in Saaremaa       | Pathogen population + Inoculation type                                     | Host cluster + Host population (Host cluster) + Host genotype (Host population) + Pathogen genotype (Pathogen population)                                                         |

**Table S3.** The response variables examined in the models described in Table S2. Given are the response variable, a verbal description, potential transformation and link function used. For identity links, we assumed normally distributed errors and for logit links binomially distributed errors.

| <b>Response</b>         | <b>Description</b>                                       | <b>Transformation</b> | <b>Link function</b> |
|-------------------------|----------------------------------------------------------|-----------------------|----------------------|
| Infectivity             | Whether or not infection takes place (0/1)               |                       | Logit                |
| Time to sporulation     | Time to sporulation (days)                               |                       | Identity             |
| Aggressiveness          | Bevan score                                              |                       | Identity             |
| Colony size             | Size of the largest colony (mm <sup>2</sup> )            | Log <sub>10</sub>     | Identity             |
| Fitness 1               | Fitness measure (without penalty)                        |                       | Identity             |
| Fitness 2               | Fitness measure (with penalty)                           |                       | Identity             |
| Sexual spore production | Whether or not sexual spores are present on day 20 (0/1) |                       | Logit                |

**Table S4.** Mean values and standard deviation of parasite life-history traits for Åland and Saaremaa. For each region, we used the inoculations between plant and pathogen genotypes collected from the focal populations.

|                                | Åland |       | Saaremaa |       |
|--------------------------------|-------|-------|----------|-------|
|                                | Mean  | Stdev | Mean     | Stdev |
| <i>Infectivity</i>             | 0.675 | 0.469 | 0.613    | 0.488 |
| <i>Time to sporulation</i>     | 8.043 | 1.165 | 8.150    | 1.213 |
| <i>Aggressiveness</i>          | 3.255 | 0.644 | 3.260    | 0.649 |
| <i>Colony size</i>             | 2.415 | 1.478 | 2.363    | 1.046 |
| <i>Fitness 1</i>               | 2.365 | 0.673 | 2.419    | 0.598 |
| <i>Fitness 2</i>               | 1.531 | 0.300 | 1.549    | 0.279 |
| <i>Sexual spore production</i> | 0.333 | 0.473 | 0.162    | 0.374 |



**Table S5.** The spatial scale of variation in mean values of pathogen life-history traits for each of two regions. Shown is the relative amount of variation in the mean trait levels explained by each spatial scale. Estimates in bold are significant ( $p < 0.05$ ). For further details, see models 2 and 3 in Appendix A.

|                 | <i>Measure (n)</i>                       | <b>Pathogen</b>          |                           | <b>Host</b>              |                           |
|-----------------|------------------------------------------|--------------------------|---------------------------|--------------------------|---------------------------|
|                 |                                          | <i>Among populations</i> | <i>Within populations</i> | <i>Among populations</i> | <i>Within populations</i> |
| <b>Åland</b>    | <i>Infectivity (n = 240)</i>             | 0.000                    | <b>0.456</b>              | 0.179                    | <b>0.365</b>              |
|                 | <i>Time to sporulation (n = 162)</i>     | 0.000                    | <b>0.274</b>              | 0.000                    | 0.017                     |
|                 | <i>Aggressiveness (n = 159)</i>          | 0.123                    | <b>0.166</b>              | 0.000                    | 0.062                     |
|                 | <i>Colony size (n = 159)</i>             | 0.102                    | <b>0.199</b>              | 0.021                    | 0.055                     |
|                 | <i>Fitness 1 (n = 159)</i>               | 0.113                    | <b>0.185</b>              | 0.000                    | 0.061                     |
|                 | <i>Fitness 2 (n = 159)</i>               | 0.090                    | <b>0.202</b>              | 0.000                    | 0.068                     |
|                 | <i>Sexual spore production (n = 126)</i> | 0.383                    | <b>0.591</b>              | 0.000                    | 0.026                     |
| <b>Saaremaa</b> | <i>Infectivity n = (240)</i>             | 0.289                    | 0.161                     | 0.000                    | <b>0.549</b>              |
|                 | <i>Time to sporulation (n = 147)</i>     | 0.003                    | <b>0.233</b>              | 0.020                    | <b>0.078</b>              |
|                 | <i>Aggressiveness (n = 146)</i>          | 0.036                    | <b>0.258</b>              | 0.000                    | <b>0.144</b>              |
|                 | <i>Colony size (n = 146)</i>             | 0.071                    | <b>0.136</b>              | 0.000                    | <b>0.150</b>              |
|                 | <i>Fitness 1 (n = 146)</i>               | 0.039                    | <b>0.273</b>              | 0.000                    | <b>0.147</b>              |
|                 | <i>Fitness 2 (n = 146)</i>               | 0.027                    | <b>0.264</b>              | 0.000                    | <b>0.134</b>              |
|                 | <i>Sexual spore production (n = 37)</i>  | 0.000                    | 0.348                     | 0.477                    | 0.174                     |

**Table S6.** Spatial partitioning of the neutral genetic and phenotypic variation. Genetic variation is based on 19 presumptively neutral SNPs and phenotypic variation is based on the pathogen infection profile on a set of 28 host plants. Shown are  $R^2$ -values and p-values.

| Data       | Region           | Among regions   | Among populations | Within populations |
|------------|------------------|-----------------|-------------------|--------------------|
| Genetic    | Saaremaa & Åland | 0.10 (p = 0.09) | 0.39 (p = 0.03)   | 0.51               |
|            | Åland            |                 | 0.39 (p = 0.09)   | 0.61               |
|            | Saaremaa         |                 | 0.48 (p = 0.03)   | 0.52               |
| Phenotypic | Saaremaa & Åland | 0.03 (p = 0.65) | 0.20 (p = 0.37)   | 0.78               |
|            | Åland            |                 | 0.10 (p = 0.83)   | 0.90               |
|            | Saaremaa         |                 | 0.31 (p = 0.05)   | 0.69               |
